# Supplementary material
Source: PubMed Central journal article supplement (PMC6504574)
Supplement: NIHMS1524342-supplement-1.pdf [file NIHMS1524342-supplement-1.pdf]

## Supplementary Figures and Figure Legends

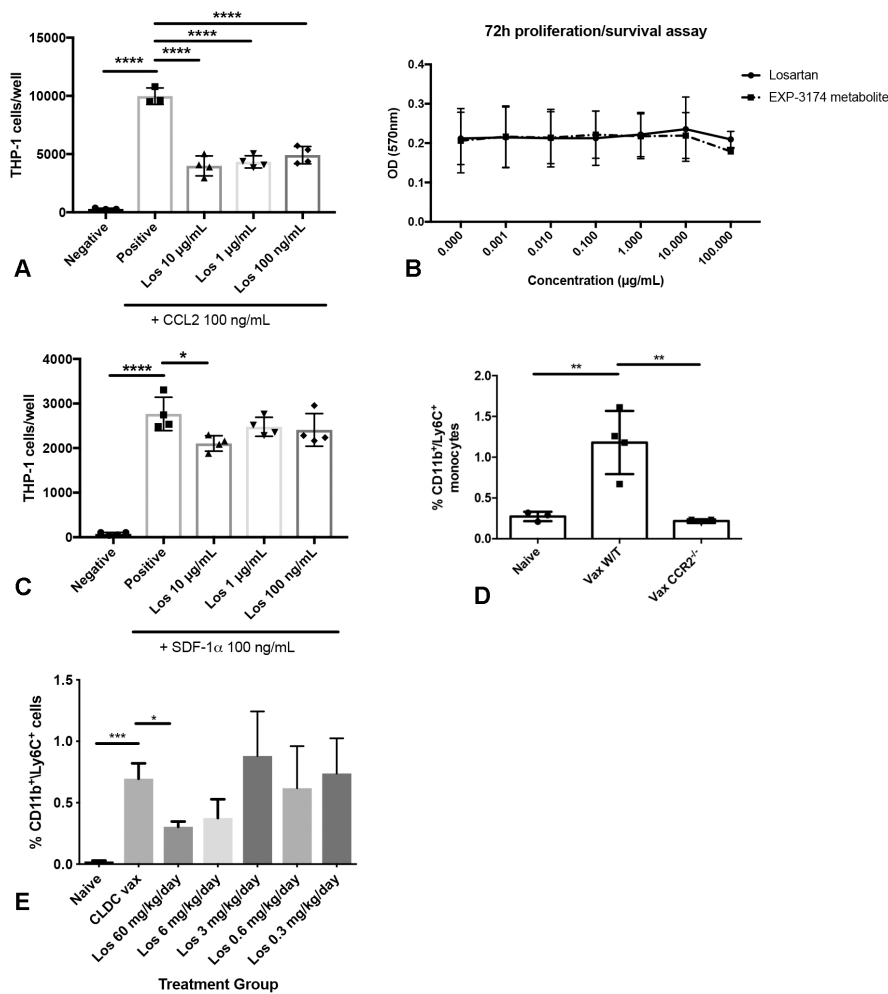

**Figure S1.** Losartan demonstrates dose-dependent inhibition of CCL2-CCR2 monocyte recruitment *in vitro* and *in vivo*. **(A)** Quantification of *in vitro* CCL2-directed THP-1 monocyte migration across a range of three 10-fold dilutions of losartan treatment. \*\*\*\* $p < 0.0001$ , one-way ANOVA. **(B)** Dose-response curve quantifying the effects of losartan or EXP-3174 metabolite on proliferation and survival of THP-1 cells over 72 hours, assessed via MTT (3-(4,5-dimethylthiazol-2-yl)-2,5-diphenyltetrazolium bromide) colorimetric assay. **(C)** Quantification of the effects of losartan on *in vitro* SDF-1 $\alpha$ -directed THP-1 migration across the same range of three 10-fold dilutions of losartan treatment shown in (A). \*\*\*\* $p < 0.0001$ , \* $p = 0.022$ , one-way ANOVA. **(D)** Flow cytometric quantification of % Ly6G<sup>-</sup>/CD11b<sup>+</sup>/Ly6C<sup>Hi</sup> IMs in the popliteal lymph nodes of naïve (un-injected) C57BL/6 w/t mice as compared to C57BL/6 w/t (Vax W/T) or CCR2<sup>-/-</sup> (VAX CCR2<sup>-/-</sup>) mice 24 hours post-footpad injection of a liposome-TLR3 agonist adjuvant, demonstrating that recruitment of inflammatory monocytes (IMs) to vaccine draining LNs is entirely dependent on the chemokine receptor CCR2. \*\* $p < 0.01$ , one-way ANOVA. **(E)** Flow cytometric quantification of inflammatory monocytes in vaccine-draining popliteal LNs of mice, demonstrating a dose dependent effect of losartan on inhibition of *in vivo* CCL2-CCR2 monocyte recruitment. \*\*\* $p = 0.0003$ , \* $p = 0.036$ , *t* test. Data (means  $\pm$  SEM) are from one representative of three to five independent experiments (A, B, D), three independent experiments (C), or are pooled from two independent experiments (E,  $n = 3-6$  mice/group).

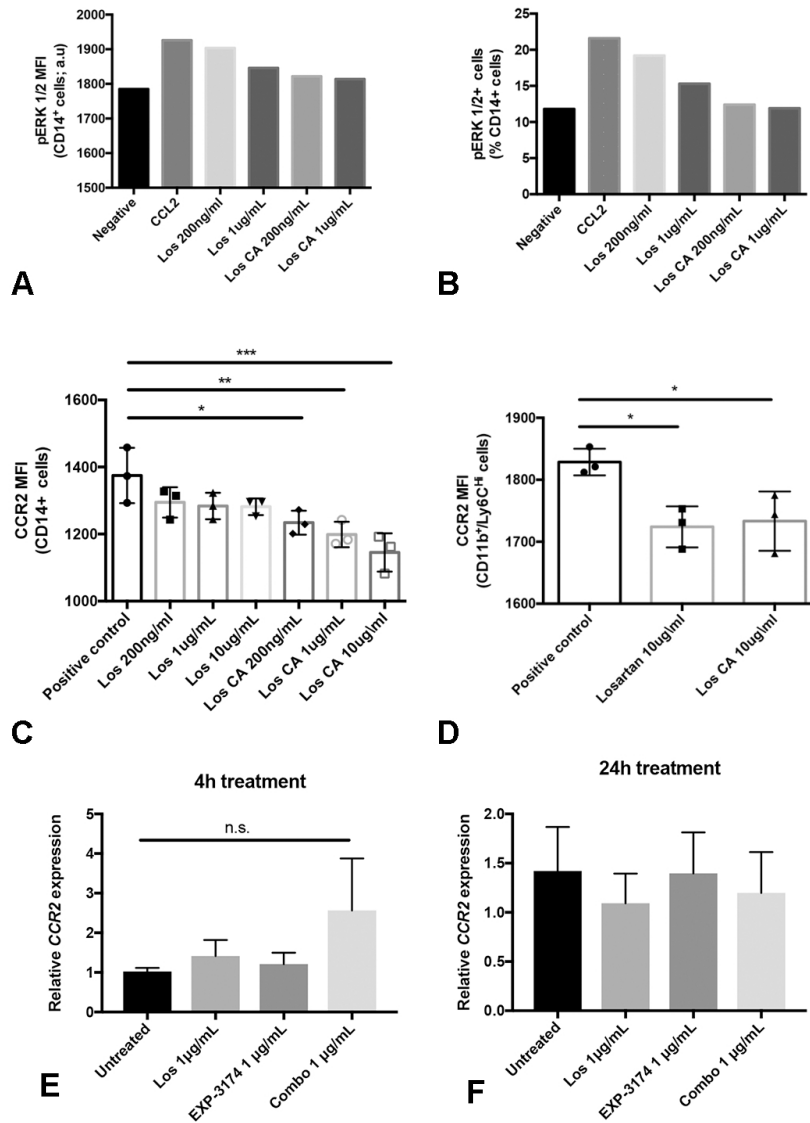

**Fig. S2.** Losartan and its metabolite EXP3174 decrease CCL2-induced ERK phosphorylation and CCR2 cell surface expression in primary human peripheral blood monocytes and murine bone marrow monocytes. **(A, B)** Graphs showing flow cytometric quantification of *pERK1/2* geometric MFI in CD14<sup>+</sup> monocytes (A), and *pERK1/2*<sup>+</sup> cells as % of total gated CD14<sup>+</sup> monocytes (B). **(C, D)** Bar graphs of flow cytometric quantification of cell surface CCR2 expression (expressed as geometric mean fluorescence intensity, MFI) in human peripheral blood CD14<sup>+</sup> monocytes (C; three replicates from one donor, \**p* < 0.05, \*\**p* < 0.01, and \*\*\**p* < 0.001, one-way ANOVA) and Ly6G<sup>-</sup>/CD11b<sup>+</sup>/Ly6C<sup>+</sup> murine bone marrow monocytes (D; \**p* < 0.05, one-way ANOVA, *n* = 3 mice/group), following 4 hours of treatment with a range of clinically relevant concentrations of losartan and EXP3174 metabolite. **(E and F)** Effects of losartan (los), EXP3174 metabolite, or combination treatment on CCR2 mRNA expression in THP-1 cells, relative to vehicle control treated cells, following 4 h (E) and 24 h (F) of drug treatment. N.S., not significant, *p* > 0.05, one-way ANOVA. Data (means ± SD) are from one representative of two independent experiments (A, B, C, and D), or are pooled from two independent experiments (E and F, *n* = 4 to 5).

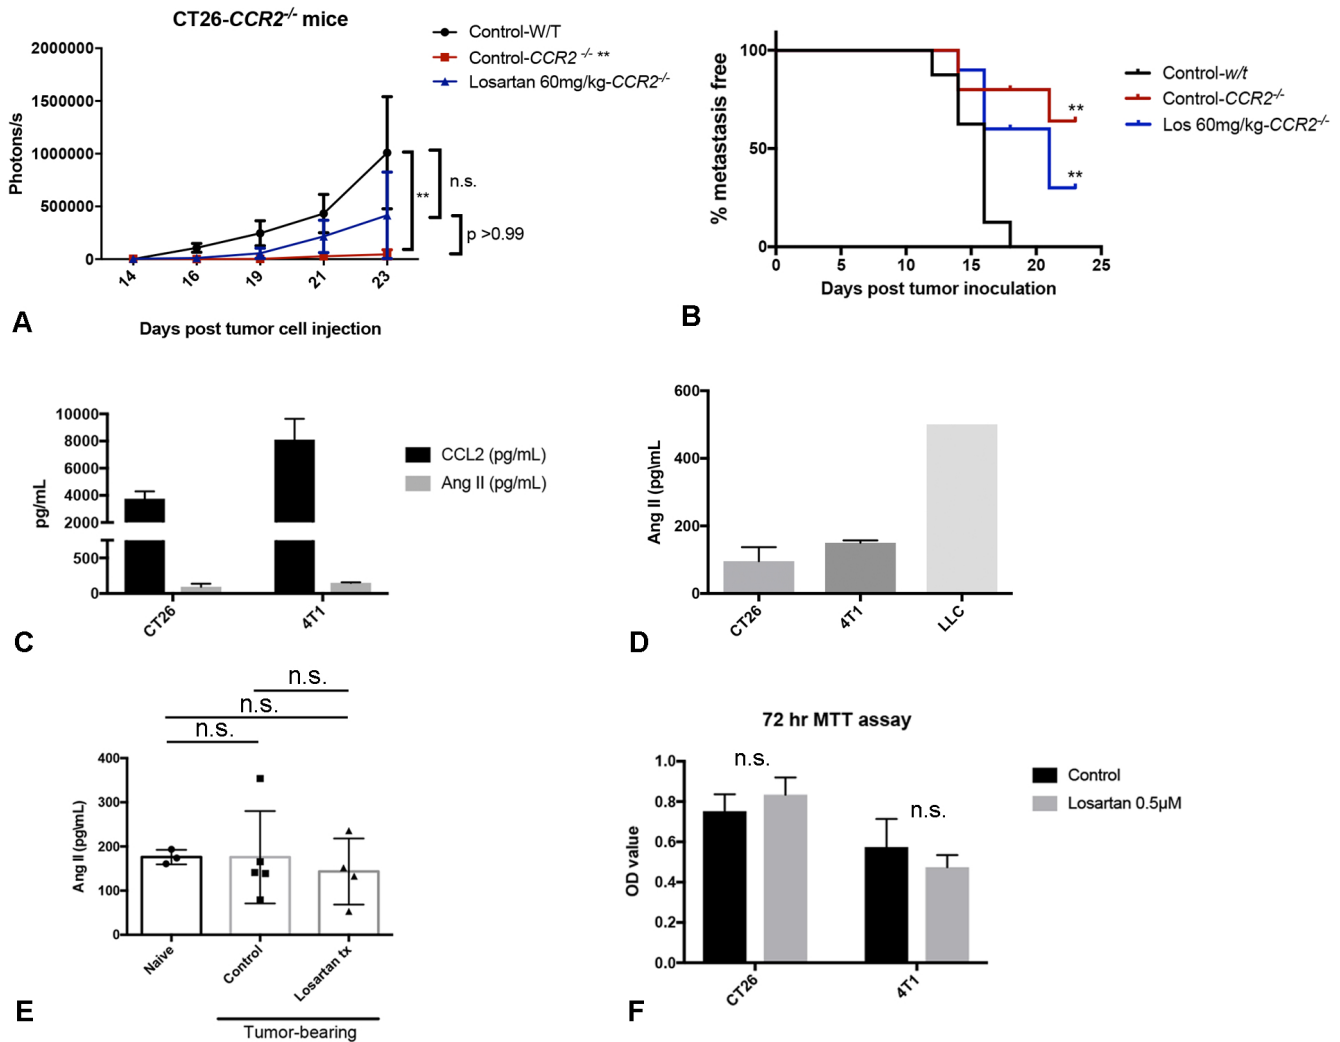

**Figure S3.** Losartan-mediated blockade of IM recruitment and associated anti-tumor effects are not associated with changes in Angiotensin II-AT1R signaling. **(A)** Quantification of CT26 luciferase-positive pulmonary metastatic burden over time in WT control, *CCR2*<sup>-/-</sup>, and losartan-treated *CCR2*<sup>-/-</sup> mice by repeated bioluminescent imaging. \*\**p* < 0.01, n.s. *p* > 0.05, two-way ANOVA. **(B)** Kaplan-Meier curve demonstrating time to detection of luciferase-positive CT26 pulmonary metastases in WT control, *CCR2*<sup>-/-</sup>, and losartan-treated *CCR2*<sup>-/-</sup>. \*\**p* < 0.01, Log-rank test. **(C and D)** In vitro *CCL2* and *Ang II* production by 4T1, CT26, and LLC cell lines, measured by ELISA assay performed on cell culture supernatants following 24h of culture. **(E)** Ang II levels in the serum of untreated-control and losartan-treated CT26 luciferase-positive pulmonary metastasis-bearing mice as compared to naïve BALB/c mice, as measured by ELISA. n.s., *p* > 0.05, one-way ANOVA. **(F)** Results of MTT survival/proliferation assay following 72hr treatment of 4T1 or CT26 cells with losartan at the indicated concentrations. n.s., *p* > 0.05, *t* test. Data (means ± SD) are from one representative of two independent experiments (A-D, and F; *n* = 5 mice/group), or one independent experiment (E; *n* = 3-5 mice/group).

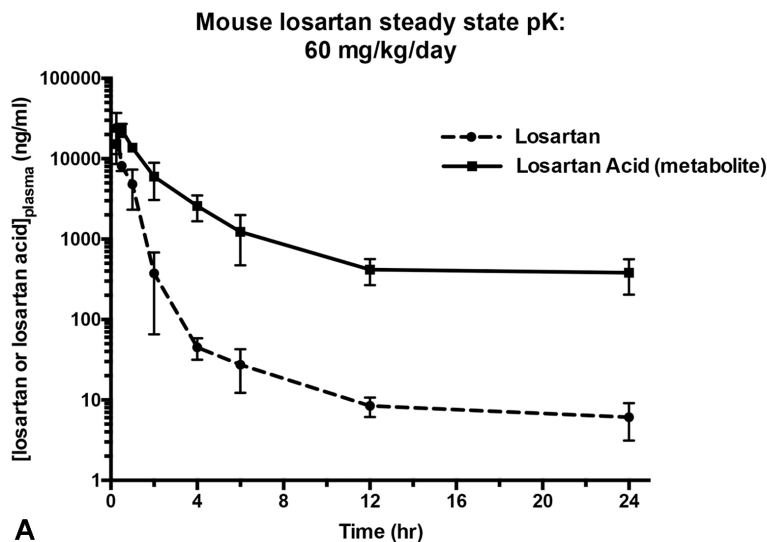

| <b>Table 1:</b>                                                   |                                | <b>Parameters</b>                                   |                  |                   |  |
|-------------------------------------------------------------------|--------------------------------|-----------------------------------------------------|------------------|-------------------|--|
|                                                                   | $C_{max}$ ( $\mu\text{g/mL}$ ) | $AUC_{0-\infty}$ ( $\mu\text{g}\cdot\text{hr/mL}$ ) | $T_{1/2,l}$ (hr) | $C_{24h}$ (ng/mL) |  |
| <b>Losartan</b>                                                   | $24.3 \pm 12.8$                | 13.62                                               | 25.8             | $6.11 \pm 2.99$   |  |
| <b>Losartan<br/>carboxylic acid<br/>metabolite<br/>(EXP 3174)</b> | $22.9 \pm 4.2$                 | 47.83                                               | –                | $382 \pm 178$     |  |

**B**

**Figure S4.** Steady-state pharmacokinetics of high dose losartan in mice. **(A)** Mean plasma concentration of losartan and losartan carboxylic acid metabolite (EXP3174) in mice following 14 days of intra-peritoneal dosing at 60mg/kg once daily. Drug levels were measured by LC/MS/MS at the indicated post-dose time points following the last dose on day 14. **(B)** Table 1 summarizing PK parameters from data shown in (A). Data representative of the mean  $\pm$  SD,  $n = 3$  mice per time point.
